# Supplementary material for: Understanding representations of uncertainty, an eye-tracking study part II: The effect of expertise
Source: Copernicus journal article supplement (doi:10.5194/egusphere-2022-929), 2022-11-10
Supplement: Supplementary file [file egusphere-2022-929-AC1-supplement.pdf]

Reviewer 1

This paper is linked/an extension to a previous study, but it does have a novel aspect and there is a clear rationale for the study.

I feel there needs to be more discussion examining the decisions linked to expertise. I feel the findings need to be slightly toned down to reflect the lack of significant differences in decision making capacity relative to expertise as there was a difference at 50% but not 30 or 70%.

**Response: Further discussion of the findings and links with expertise have been added to the discussion. Furthermore, the findings have been more explicit at this point and so toned down.**

It may be minor but introducing someone else's results (line 238, 279) in your results section is quite confusing.

**Response: This has been amended. Both this and a similar justification has been moved into the introduction to bolster the motivation for our research questions. There is now no direct report of results from previous papers made in this paper.**

Also relative to the experts and non-experts, I would agree with the comments made in line 336 considering the recruitment of true experts in the area as a comparison. It would also help to link back to why expertise had little impact on eye movement behaviour (line 341)

**Response: This has been added.**
